# Supplementary material for: Enhancing the reactivity of uranium(vi) organoimido complexes with diazoalkanesElectronic supplementary information (ESI) available: experimental, including general procedures, materials and synthesis of complexes 2 and 3. See http://www.rsc.org/suppdata/cc/b1/b109455f/
Source: Royal Society of Chemistry journal article supplement (doi:10.1039/b109455f), 2001-12-03
Supplement: b109455f.doc [file b109455f.doc]

**Electronic Supplementary Information** for “Enhancing the Reactivity of Uranium(VI) Organoimido Complexes with Diazoalkanes.”

## Experimental

**General Procedures.** Unless otherwise noted, reactions and manipulations were performed at 20 ºC in a recirculating Vacuum Atmospheres Model HE-553-2 inert atmosphere (N2 or He) drybox with a MO 40-2 Dri-Train, or using standard Schlenk and high vacuum line techniques. Glassware was dried at 150 ºC before use. All NMR spectra were obtained using a Varian Unity Inova 300 MHz spectrometer. Except when noted, all NMR spectra were acquired at room temperature (21 ºC).

C6D6 and toluene-*d*8 were obtained from Cambridge Isotope Laboratories (CIL). Chemical shifts were referenced to protio solvent impurities  7.14, C6D6; 2.09, toluene-*d*8), which are referenced to internal Si(CH3)4 at  0.00 ppm.

Melting points were determined with a Met-Temp II capillary melting point apparatus equipped with a Fluke 50S K/J thermocouple using capillary tubes flame-sealed under nitrogen; values are uncorrected. Mass spectrometric (MS) analyses were obtained at the University of California, Berkeley mass spectrometry facility on VT-ProSpec, ZAB2-EQ, and 70-FE mass spectrometers. Elemental analyses were performed at the University of California, Berkeley Microanalytical facility on a Perkin Elmer 2400 Series II CHNO/S Analyzer.

Electronic absorption spectral data were obtained for toluene solutions of all complexes over the wavelength range from 300 to 1600 nm on a Perkin-Elmer Model Lambda 19 ultraviolet-visible-near infrared spectrophotometer. All data were collected in 1cm path length cuvettes loaded in an inert atmosphere glove box and run versus a toluene reference. Strong absorption bands from overtone vibrations of the toluene solvent precluded the collection of data at wavelengths longer than 1600 nm, but samples were run separately versus air references to ensure that the observed absorption bands were attributable to the complexes and not the solvent. All samples were run at two dilutions to optimize absorbance in the UV-visible and near infrared respectively. For complex **2**, the concentrations were 0.04 mM and 0.2 mM. For complex **3**, the concentrations were 0.88 mM and 0.18 mM. Spectral resolution was typically 2 nm in the visible region and 4-6 nm in the near infrared. Electronic absorption data were analyzed using Wavemetrics IGOR Pro (Version 4.0) software on a Macintosh platform.

X-ray data were collected and the structures solved at the Los Alamos National Laboratory X-ray facility by Dr. Brian L. Scott using a Bruker P4/CCD diffractometer and cooled to 203 K using a Bruker LT-2 temperature device. Details regarding data collection are provided in the form of CIF files.

**Materials.** Unless otherwise noted, regents were purchased from commercial suppliers and used without further purification. Potassium bromide (Wilmad), Celite (Aldrich), and alumina (Brockman I, Aldrich) were dried in vacuo at 250 ºC for 48 h prior to use. Toluene (Fisher), hexanes (Fisher), diethyl ether (Fisher), and tetrahydrofuran (Fisher) were passed through a column of activated alumina (A2, 12 x 32, Purify) under nitrogen pressure and sparged with N2 prior to use. (C5Me5)2U(=N-2,4,6-*t*-Bu3C6H2)1 and diphenyldiazomethane2 were prepared according to literature procedures. Deuterated solvents (Cambridge Isotope Laboratories) were purified by storage over activated 4Å molecular sieves or sodium metal and then degassed by three freeze-pump-thaw cycles prior to use.

**Synthesis of (C5Me5)2U(=N-2,4,6-*t*-Bu3C6H2)(=N-N=CPh2) (2):**

### A 125 ml side-arm flask equipped with a stir bar was charged with (C5Me5)2U(=N-2,4,6-*t*-Bu3C6H2) (0.500 g, 0.651 mmol) and 40 ml toluene. To this mixture was added dropwise with stirring a toluene solution (20 ml) of diphenyldiazomethane (0.163 g, 0.839 mmol). The resulting mixture was stirred at room temperature for 9 h, then filtered through a Celite-padded coarse frit, and the volatiles removed under reduced pressure to afford a brown crystalline solid residue. The solid was taken up in 40 ml hexanes and filtered through a Celite-padded coarse frit and slow evaporation of this solution afforded analytically pure 2 as a brown crystalline solid (0.607 g, 0.631 mmol, 97%): 1H NMR (Toluene-*d*8, 300 MHz)  10.58 (br s, 1H, Ar-*H*), 10.09 (br s, 1H, Ar-*H*), 7.57 (t, *J* = 7.3 Hz, 4H, Ar-*H*), 6.95 (d, *J* = 7.8 Hz, 4H, Ar-*H*), 6.33 (t, *J* = 7.2 Hz, 2H, Ar-*H*), 4.85 (s, 30 H, Cp*-C*H*3), 3.42 (br s, 9H, C-C*H*3), 2.18 (br s, 9H, C-C*H*3), 1.54 (s, 9H, C-C*H*3). UV-vis/NIR (, M-1cm-1, toluene): 325 (18,700), 450 (10,950), 705 (1510), 900 (880), 1385 (50).

Mp = 158-161 ºC (dec.). MS (EI, 70 eV): m/z 963 (M+ + 2), 962 (M+ + 1), 961 (M+), 825 (M+ - Cp*), 796 (M+ - N=CPh2), 767 (M+ - N-N=CPh2). Anal. Calcd. for C51H69N3U (962.14 g/mol): C, 63.66; H, 7.23; N, 4.37. Found: C, 63.45; H, 7.32; N, 4.33.

**Synthesis of Complex (3):**

A 125 ml side-arm flask equipped with a stir bar was charged with (C5Me5)2U(=N-2,4,6-*t*-Bu3C6H2) (0.569 g, 0.741 mmol) and 30 ml toluene. To this mixture was added dropwise with stirring a toluene solution (10 ml) of diphenyldiazomethane (0.171 g, 0.880 mmol). The resulting mixture was stirred at room temperature for 17 h, then transferred to a 200 mL glass bomb sealed with a Teflon valve and placed in an 85 ºC oil bath for 14 h. The resulting dark cherry red solution was filtered through a Celite-padded coarse frit and the volatiles removed under reduced pressure to afford a dark red foamy solid. The residue was taken up in 20 mL hexanes and filtered through a Celite-padded coarse frit and slow evaporation of this solution gave analytically pure **3** as a cherry red crystalline solid (0.522 g, 0.543 mmol, 73%):

1H NMR (Toluene-*d*8, 300 MHz, 80ºC)  36.21 (br s, 2H, C*H*2), 16.43 (br s, 6H, C*H*3), 9.45 (s, 1H, Ar-H), 7.97 (t, *J* = 7.8 Hz, 1H, Ar-*H*), 7.55 (t, *J* = 7.2 Hz, 2H, Ar-*H*), 5.91 (d, *J* = 6.9 Hz, 2H, Ar-*H*), 4.58 (t, *J* = 7.2 Hz, 1H, Ar-*H*), 3.15 (s, 30H, Cp*-*H*), 1.16 (t, *J* = 7.2 Hz, 2H, Ar-*H*), 0.86 (t, *J* = 7.5 Hz, 2H, Ar-*H*), -0.34 (s, 9H, C-C*H*3), -7.04 (s, 9H, C-C*H*3), -12.86 (s, 1H, Ar-*H*), -98.99 (s, 1H, N*H*). UV-vis/NIR (, M-1cm-1, toluene): 310 (21,150), 530 (1,290), 702 (103), 720 (100), 795 (31), 822 (28), 891 (32), 916 (32), 957 (44), 1047 (111), 1107 (76), 1137 (83), 1171 (97), 1221 (90), 1250 (54), 1350 (64), 1379 (79), 1413 (81), 1470 (50), 1570 (44). Mp = 100-102 ºC (dec.). MS (EI, 70 eV): m/z 963 (M+ + 2), 962 (M+ + 1), 961 (M+), 826 (M+ - Cp*), 797 (M+ - N=CPh2). Anal. Calcd. for C51H69N3U (962.14 g/mol): C, 63.66; H, 7.23; N, 4.37. Found: C, 63.37; H, 7.49 ; N, 3.82

**References for Supplementary Material:**

1 D. S. J. Arney and C. J. Burns, *J. Am. Chem. Soc*. 1995, **117**, 9448.

2 J. B. Miller, *J. Org. Chem*. 1959, **24**, 560.
